# Supplementary material for: Hepatic Nfe2l2 Is Not an Essential Mediator of the Metabolic Phenotype Produced by Dietary Methionine Restriction
Source: MDPI journal article supplement (doi:10.3390/nu13061788), 2021-05-24
Supplement: s1 [file s1]

**Supplementary Table 1.** Primer sequences used for qPCR

| <i>Gene</i>        | Forward                  | Reverse                    |
|--------------------|--------------------------|----------------------------|
| <i>Aox1</i>        | CTGTACCCTCAACTTACTGTCC   | ACACAAACTCCCACTTCCTG       |
| <i>GclC</i>        | GATGATGCCAACGAGTCTGA     | GACAGCGGAATGAGGAAGTC       |
| <i>Gsr</i>         | CACGACCATGATTCCAGATGTT   | CCGTCTGAATGCCCACTTTAT      |
| <i>Txnrd1</i>      | ACAGCGAGGAGACCATAGA      | CCACGGTCTCTAAGCCAATAG      |
| <i>Trb3</i>        | CCCGGTGCCCGAGCACTTTA     | GCTCGCATCTTGTCTGGAGCC      |
| <i>Atf4</i>        | GGAATGGCCGGCTATGG        | TCCCGGAAAAGGCATCCT         |
| <i>Xbp1s</i>       | CTGAGTCCGAATCAGGTGCAG    | GTCCATGGGAAGATGTTCTGG      |
| <i>Ephx1</i>       | CGACTCGATCCAGAACTAC      | ACAGGACACATTGCAGAGAG       |
| <i>Sod2</i>        | CAGATTGCTGCCTGCTCTAA     | CTGAAGGTAGTAAGCGTGCTC      |
| <i>Gsta2</i>       | GAAGGACATGAAGGAGAGAGC    | TTCTTCGATTTGTTTTGCATC      |
| <i>Cbr1</i>        | CCGAGATGTCTGCAAGGAG      | CTCACCATGCTGGACACATT       |
| <i>Mgst3</i>       | ATGGCTGTCCTCTCTAAGGAG    | CTCTACCTTGACTTCTTGCGG      |
| <i>Nqo1</i>        | AGCTGGAAGCTGCAGACCTG     | CCTTTCAGAATGGCTGGCA        |
| <i>Asns</i>        | GGGGGCCTGGACTCGAGCTT     | TTGCCACCTTTCTAGCGGCCA      |
| <i>Cyp4a14</i>     | CAGCTACCAAGGCAGTGTTTACG  | GGACAAACGTCCATCAGAGGAC     |
| <i>Fgf21</i>       | TGACACCCAGGATTTGAATGAC   | GCAGCCAATGATGTGTGCTTAC     |
| <i>Psat1</i>       | CAGTGGAGCGCCAGAATAGAA    | CCTGTGCCCCCTTCAAGGAG       |
| <i>Vldlr</i>       | TGAGCAGTGTGGCCGTCAGC     | TCGGCAGGTTTCGAGAAGGGCAG    |
| <i>Cyclophilin</i> | CTTCGAGCTGTTTGCAGACAAAGT | AGATGCCAGGACCTGTATGCT      |
| <i>Nfe2l2ex5</i>   | CCATTTACGGAGACCCACCGCCTG | CTCGTGTGAGATGAGCCTCTAAGCGG |
